# Supplementary material for: Impatiens pandurata (Balsaminaceae), a new species from Yunnan, China
Source: PubMed Central journal article supplement (PMC5432899; doi:10.1186/s40529-015-0108-4), 2015-10-23

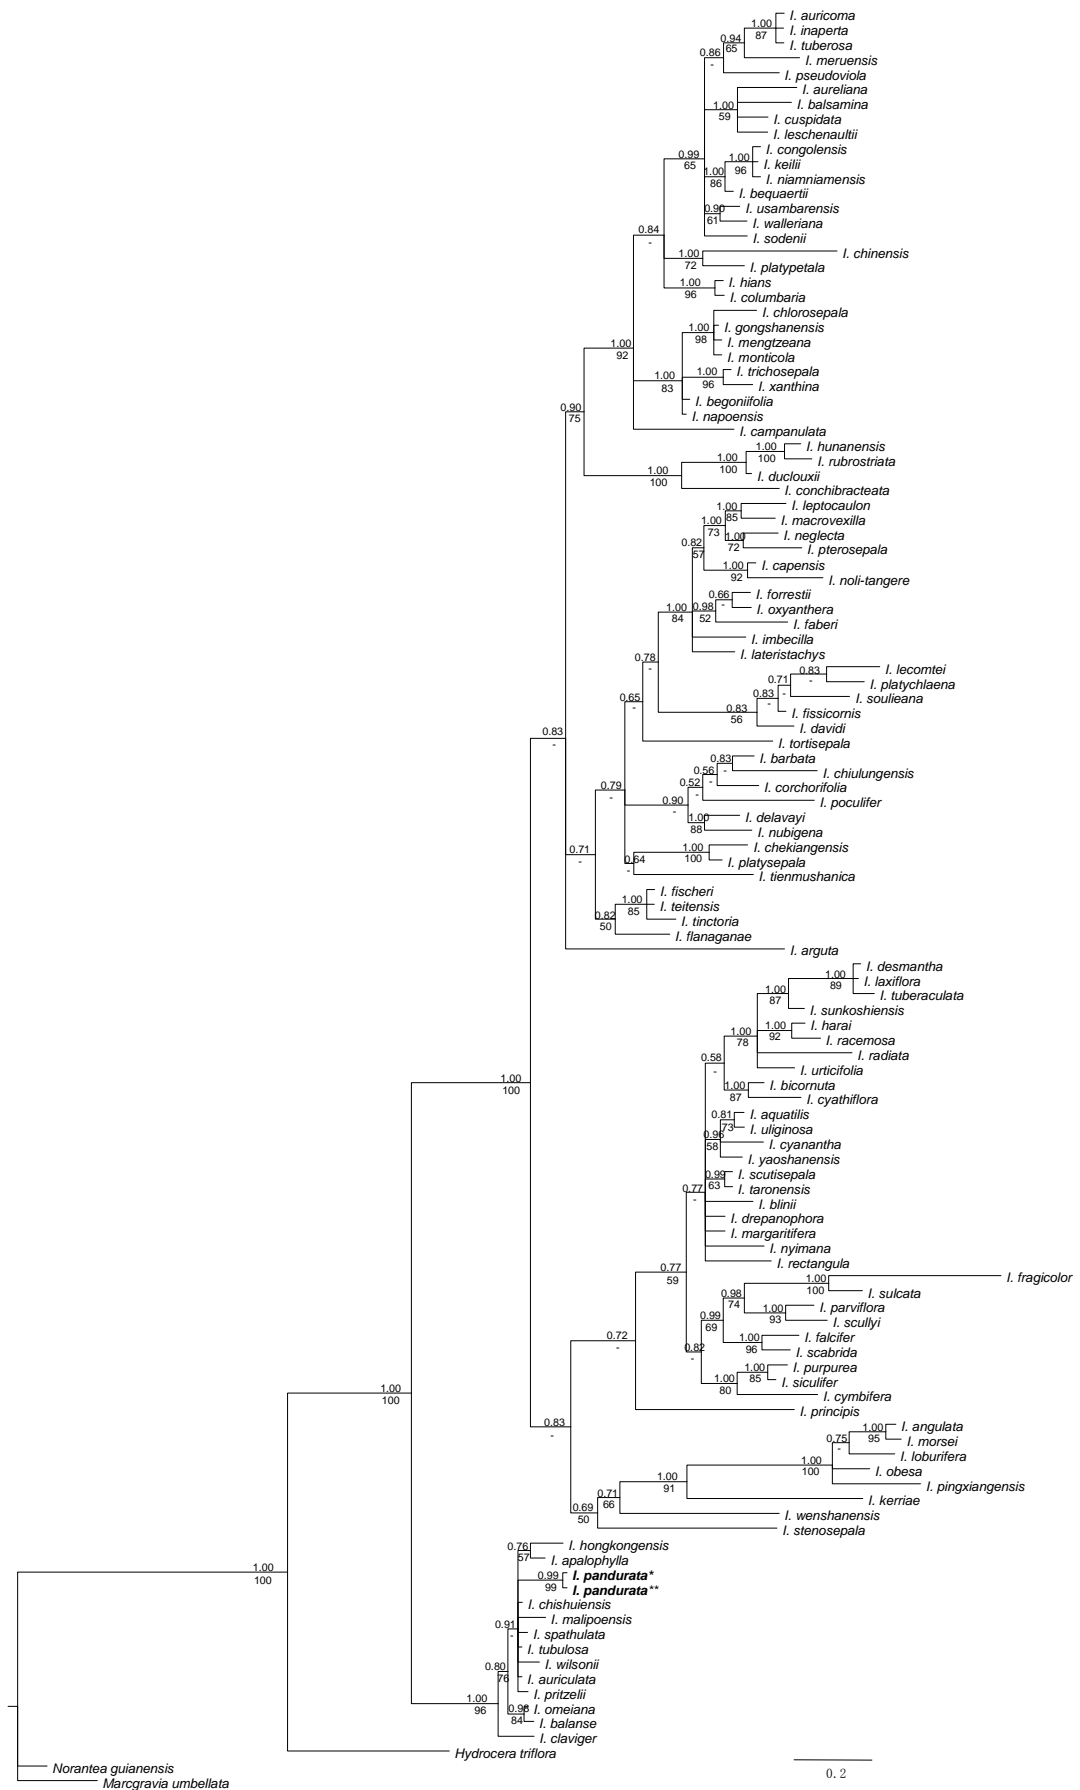

Supplement: 40529_2015_108_MOESM3_ESM.pdf [file 40529_2015_108_MOESM3_ESM.pdf]
